# Supplementary material
Source: Preprints.org preprint supplement (doi:10.20944/preprints202012.0128.v1)

**Supplementary Materials:**

**Appendix A: The “Food Traffic-light”**

**
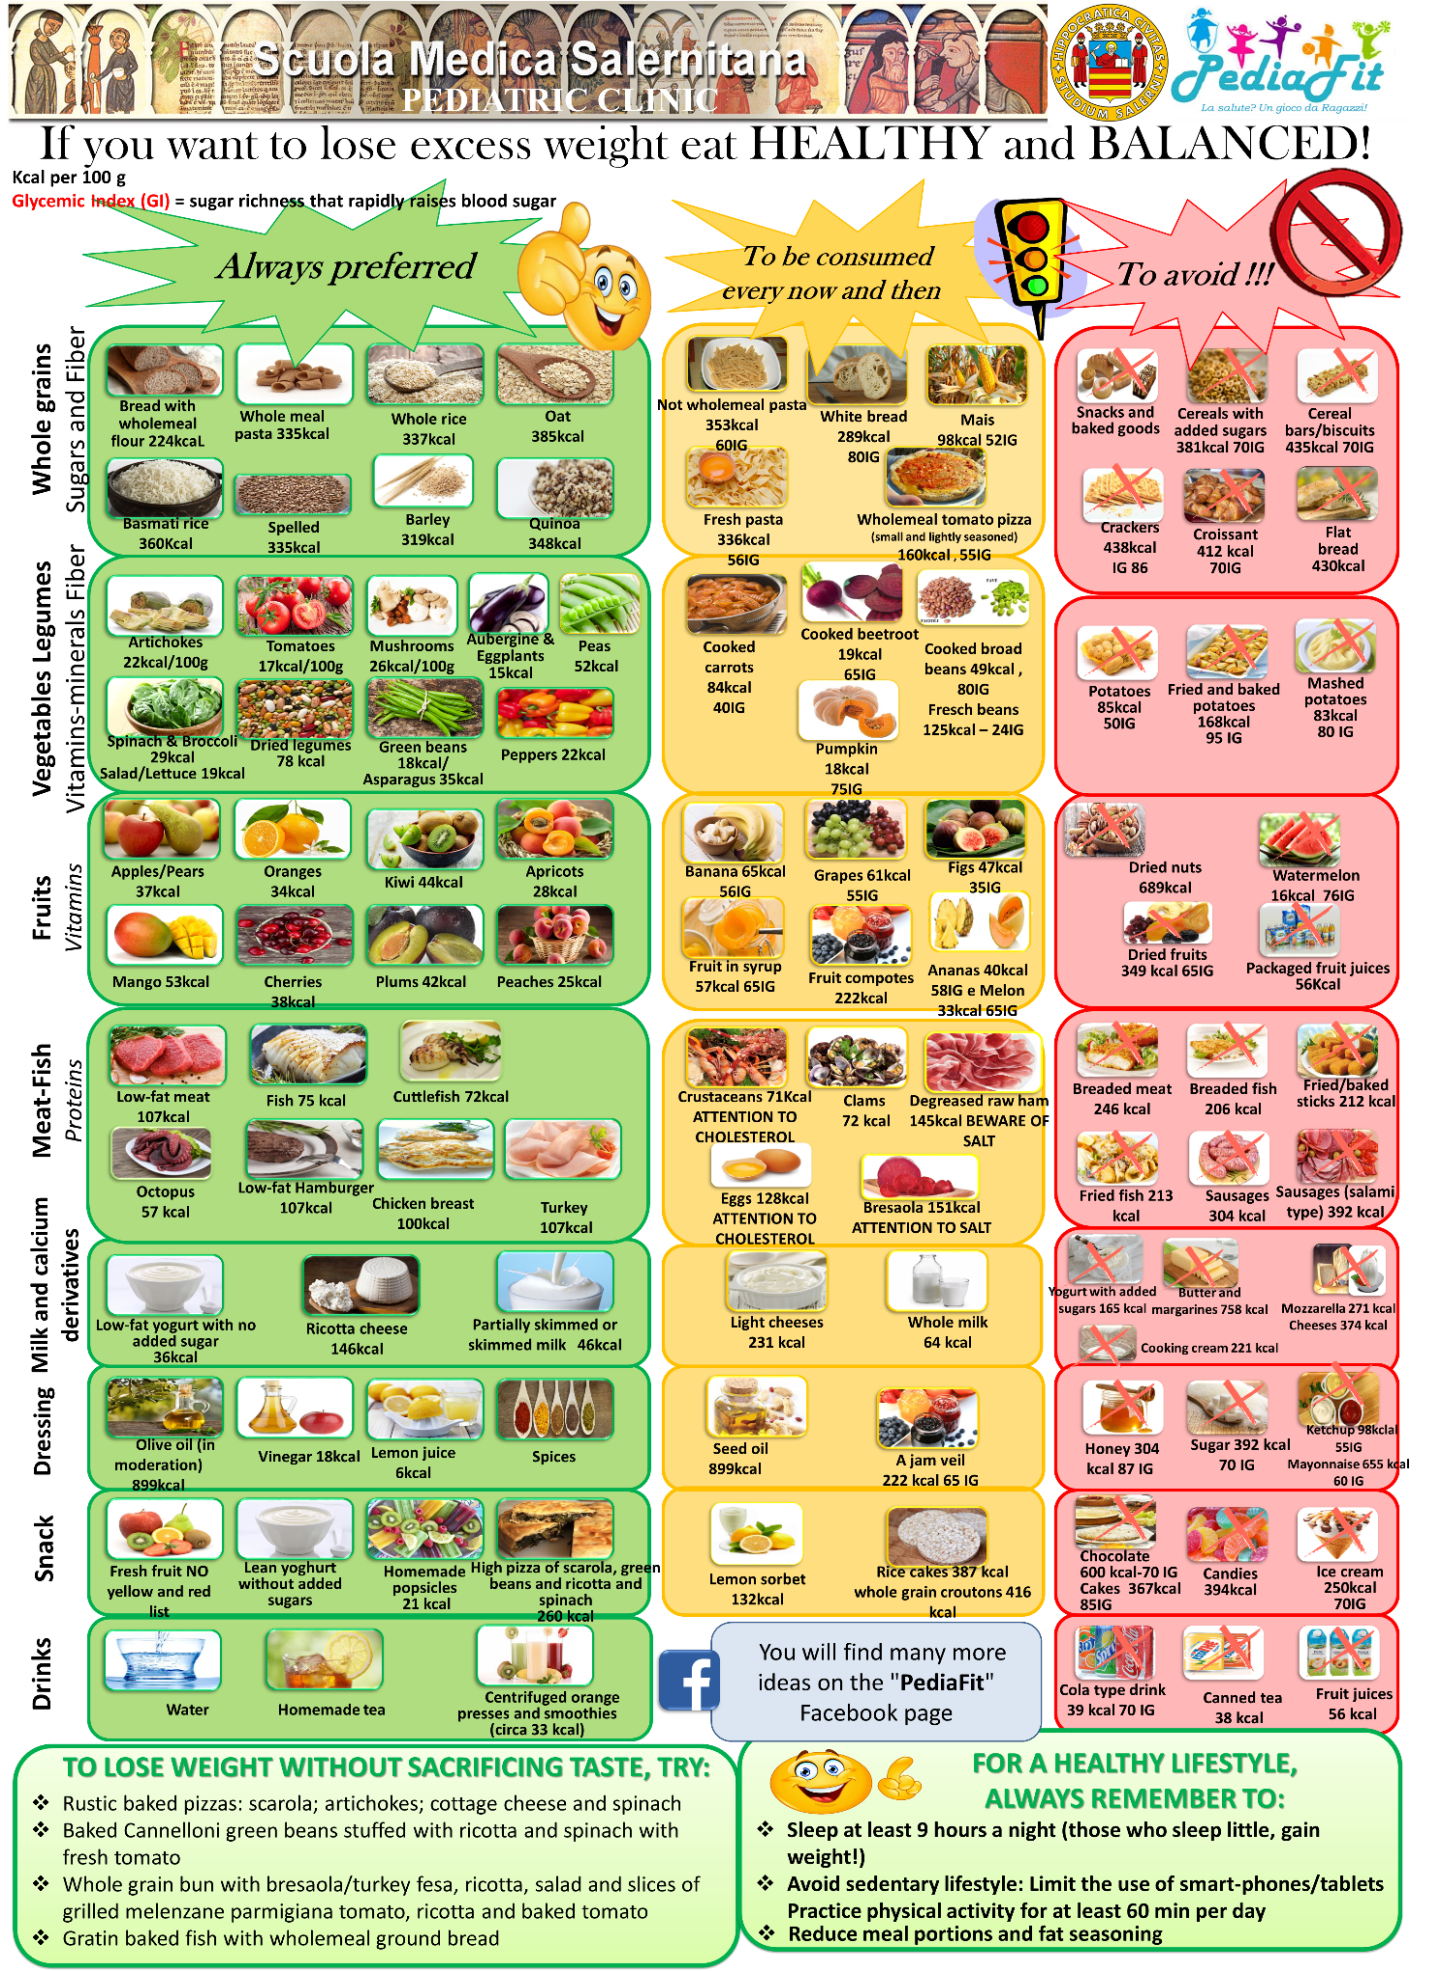
**

Supplement: Supplementary file 3 [file Supplementary Materials. Appendix A.docx]
